# Supplementary material
Source: PubMed Central journal article supplement (PMC4270938)

## SUPPLEMENTAL MATERIAL

### Supplemental Methods

#### Gene expression

Total RNA was extracted using either TRIzol (Invitrogen, Carlsbad, CA) or RNeasy kit (Qiagen) according to the manufacturer's instructions and differences in gene expression were determined using Real-Time RT-PCR as previously described<sup>1</sup>. Gene expression was determined using comparative threshold cycle ( $\Delta\Delta C_T$ ) as suggested by the manufacturer (Applied Biosystems, Foster City, CA) normalizing each sample to 18s rRNA. The following primer sets were purchased from Assays on Demand (Applied Biosystems): 18s rRNA (cat #4310893E) and *SOD3* (cat# Mm01213380-s1).

#### Proinflammatory cytokine and chemokine measurements

Cytokine and chemokine concentration in mouse lung tissue were measured using the MSD (MesoScale Discovery, Gaithersburg, MD) Proinflammatory Panel 1 V-PLEX kit.

#### Total protein in bronchoalveolar lavage

Total protein was quantitated using Coomassie Plus (Bradford) Assay kit (Thermo Fisher Scientific, Rockford, IL) per manufacturer's instructions.

### Supplemental Figures

#### Figure legends

**Fig 1. (A)** Expression of *SOD3* was measured by Real-Time RT-PCR in whole lung tissue from WT (n = 3), HET (n = 3) and HM (n = 3) animals. Gene expression was normalized to 18s rRNA

expression and displayed relative to WT samples. **(B)** Expression of *SOD3* was measured by Real-Time TR-PCR in isolated aortas from WT (n = 3), HET (n = 3) and HM (n = 3) animals. Gene expression was normalized to 18s rRNA expression and displayed relative to WT samples. **(C)** Proinflammatory cytokines and chemokines in lung tissue from WT and R213G animals at 0 (WT n = 4, R213G n = 3), 4 (WT n = 8, R213G n = 4) and 24 hours (WT n = 9, R213G n = 4) post LPS inhalation. Mediators are expressed as pg per 30ug of total protein. **(D)** Total protein in bronchoalveolar lavage fluid (BALF) in WT and R213G animals at 0 (WT n = 3, R213G n = 2), 4 (WT n = 7, R213G n = 4) and 24 hours (WT n = 4, R213G n = 7) post LPS inhalation. Data are presented as mean  $\pm$  S.E. #  $P < 0.05$  compared to samples at 0 hours for each genotype. \*  $P < 0.05$  comparing WT to R213G samples under identical conditions.

### **Supplemental References**

1. Hartney JM, Brown J, Chu HW, Chang LY, Pelanda R, Torres RM. Arhgef1 regulates alpha5beta1 integrin-mediated matrix metalloproteinase expression and is required for homeostatic lung immunity. *The American journal of pathology*. 2010;176:1157-1168

# Supplemental Figure 1

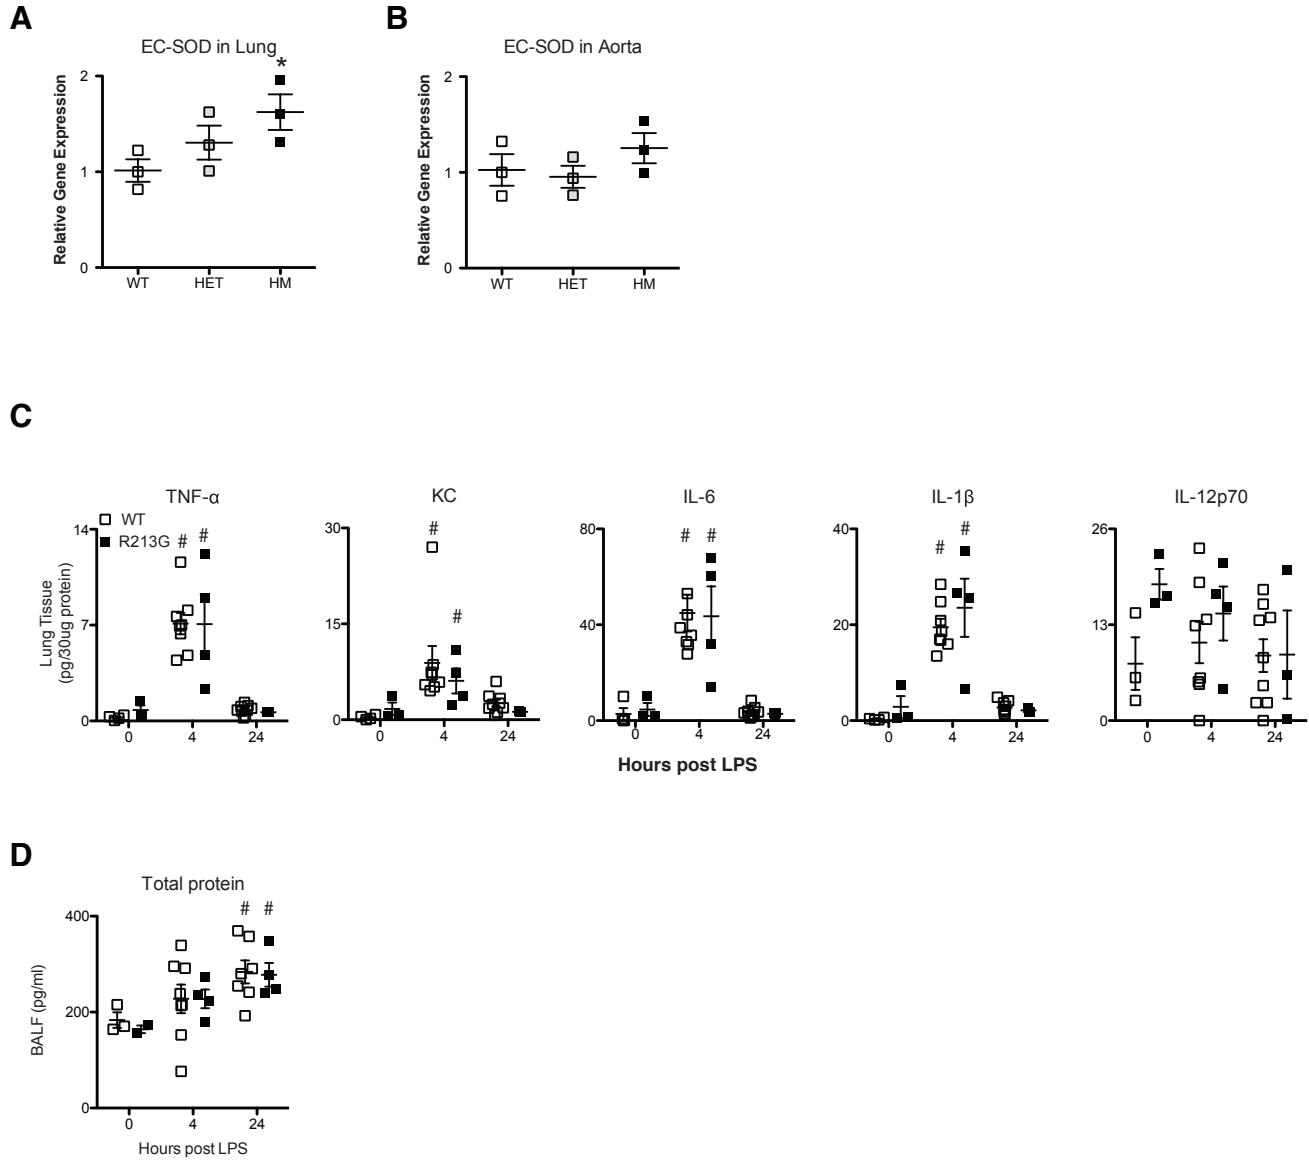

Supplement: NIHMS618766-supplement-000504_-_Supplemental_Material.pdf [file NIHMS618766-supplement-000504_-_Supplemental_Material.pdf]
